# Supplementary material for: The Recombinant Fragment of Human κ-Casein Induces Cell Death by Targeting the Proteins of Mitochondrial Import in Breast Cancer Cells
Source: MDPI journal article supplement (doi:10.3390/cancers12061427), 2020-05-31
Supplement: s1 [file s1]

**The recombinant fragment of human  $\kappa$ -Casein induces cell death by targeting the proteins of mitochondrial import in breast cancer cells**

Max Richter<sup>1\*</sup>, Fabian Wohlfromm<sup>1\*</sup>, Thilo Kähne<sup>2</sup>, Hannes Bongartz<sup>3</sup>, Kamil Seyrek<sup>1</sup>, Yuriy Kit<sup>4</sup>, Olga Chinak<sup>5</sup>, Vladimir Richter<sup>5#</sup>, Olga Koval<sup>5#</sup>, Inna Lavrik<sup>1#§</sup>

<sup>1</sup>Department of Translational Inflammation Research, Medical Faculty, Otto von Guericke University, Magdeburg, Germany

<sup>2</sup>Institute of Experimental Internal Medicine, Medical Faculty, Otto von Guericke University, Magdeburg, Germany

<sup>3</sup>Institute of Biology, Systems Biology, Faculty of Natural Sciences, Otto von Guericke University, Magdeburg, Germany

<sup>4</sup>Institute of Cell Biology, L'viv, Ukraine

<sup>5</sup>Department of Biotechnology, Institute of Chemical Biology and Fundamental Medicine, SB RAS, Novosibirsk, Russia

\*-equal contribution      #- equal contribution      §-Corresponding author

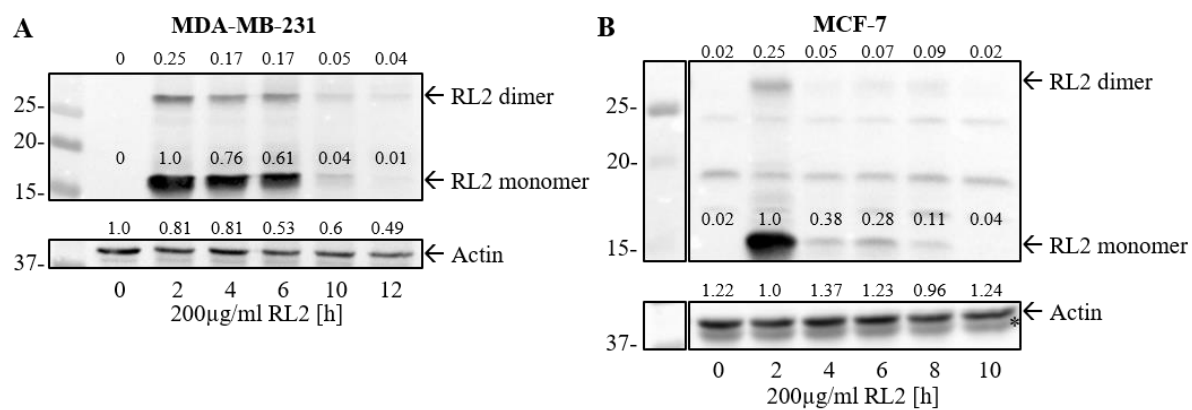

**Supplementary Figure 1. Relative Western Blot quantifications of Figure 1B and 1C.**

Quantification of protein band intensities were performed for three independent experiments with ImageLab 5.1beta (Bio-Rad). One representative quantification is shown here. Probes with a value of 1.0 served as reference for that specific protein. For more information see Figure 1.

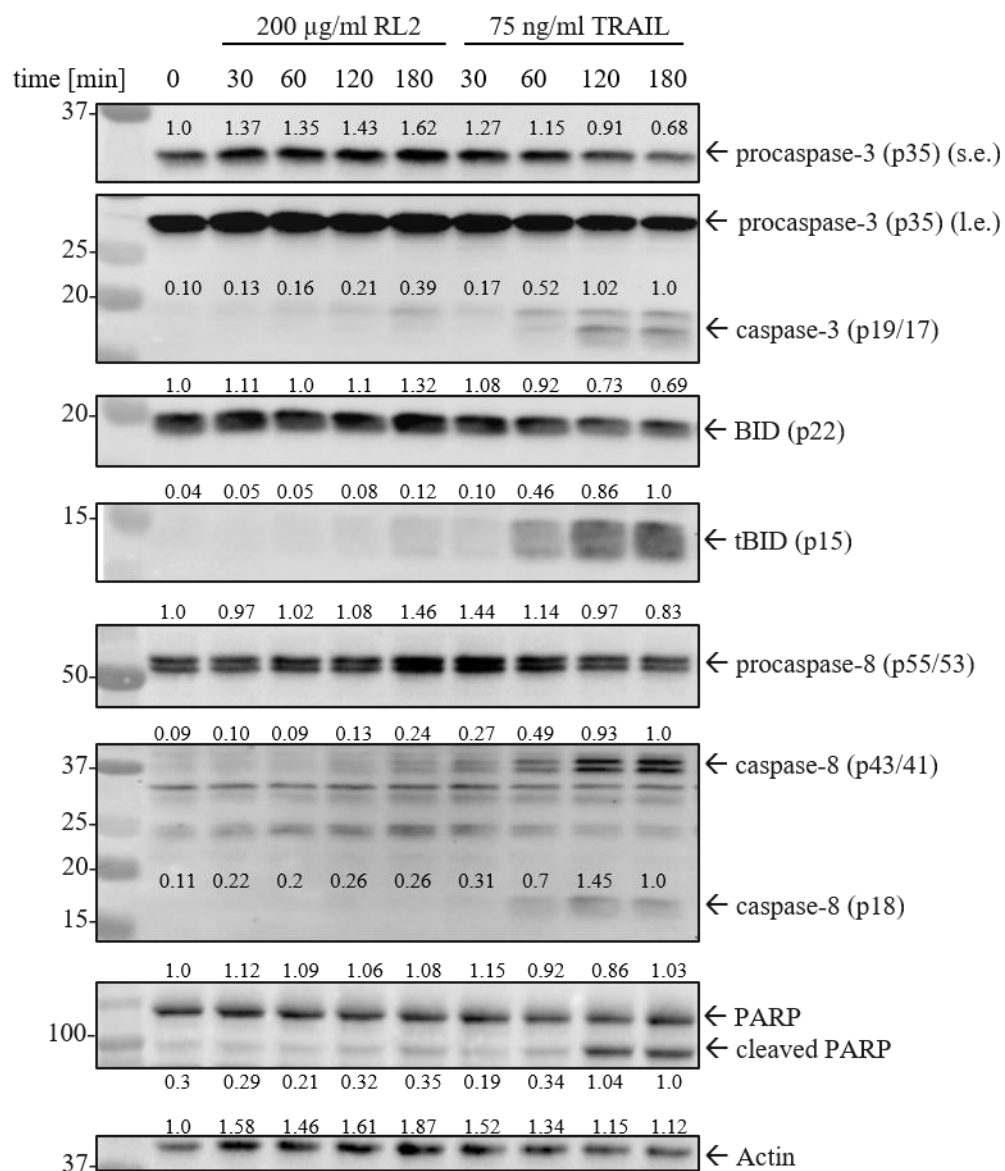

**Supplementary Figure 2. Relative Western Blot quantifications of Figure 3.**

Quantification of protein band intensities was performed with ImageLab 5.1beta (Bio-Rad). Probes with a value of 1.0 served as reference for that specific protein. For more information see Figure 3.

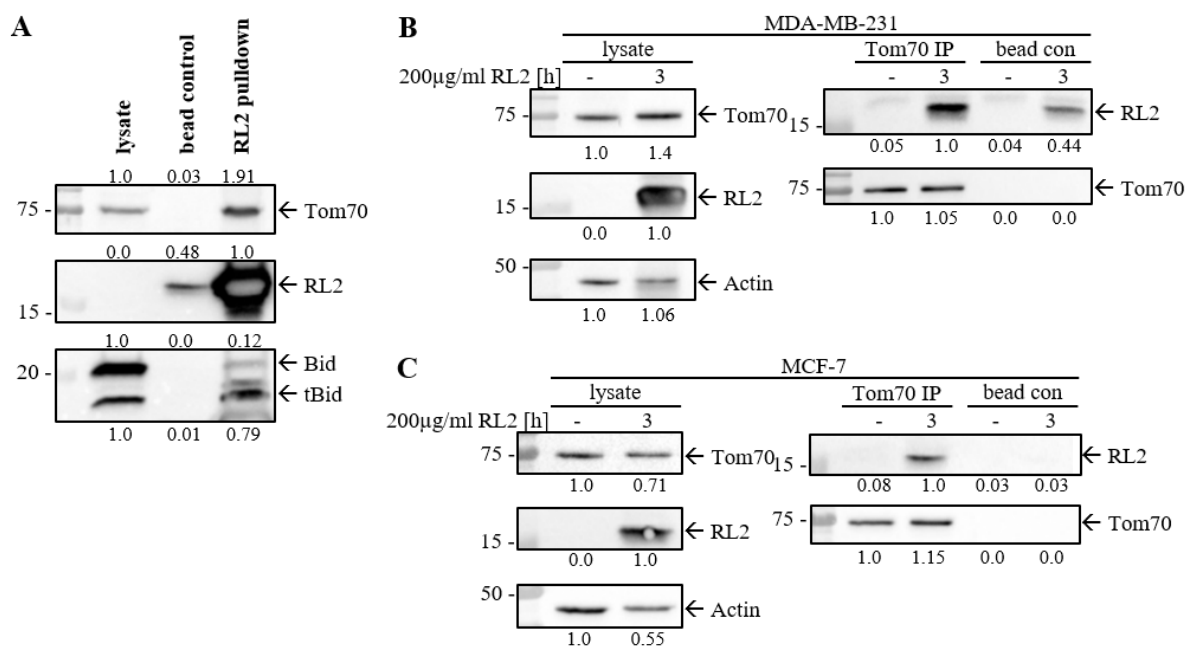

**Supplementary Figure 3. Relative Western Blot quantifications of Figure 4A, 4B and 4C.**

Quantification of protein band intensities was performed with ImageLab 5.1beta (Bio-Rad). Probes with a value of 1.0 served as reference for that specific protein. For more information see Figure 4.

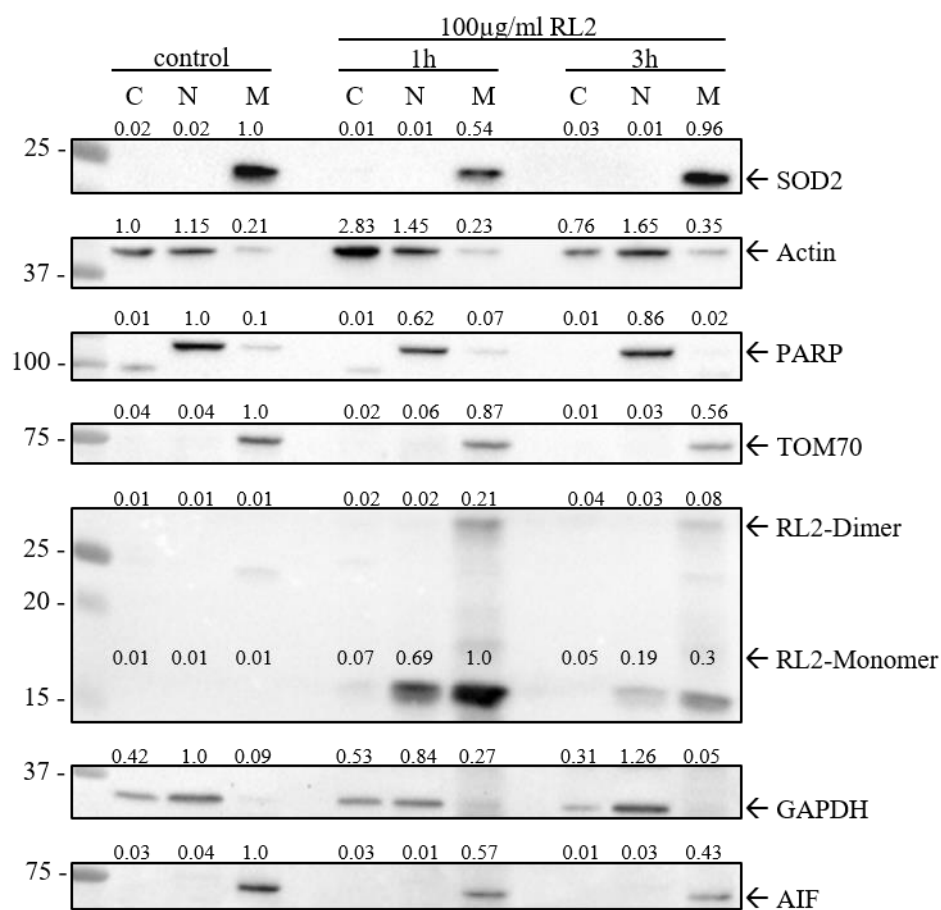

**Supplementary Figure 4. Relative Western Blot quantifications of Figure 5.**

Quantification of protein band intensities were performed for three independent experiments with ImageLab 5.1beta (Bio-Rad). One representative quantification is shown here. Probes with a value of 1.0 served as reference for that specific protein. For more information see Figure 5.

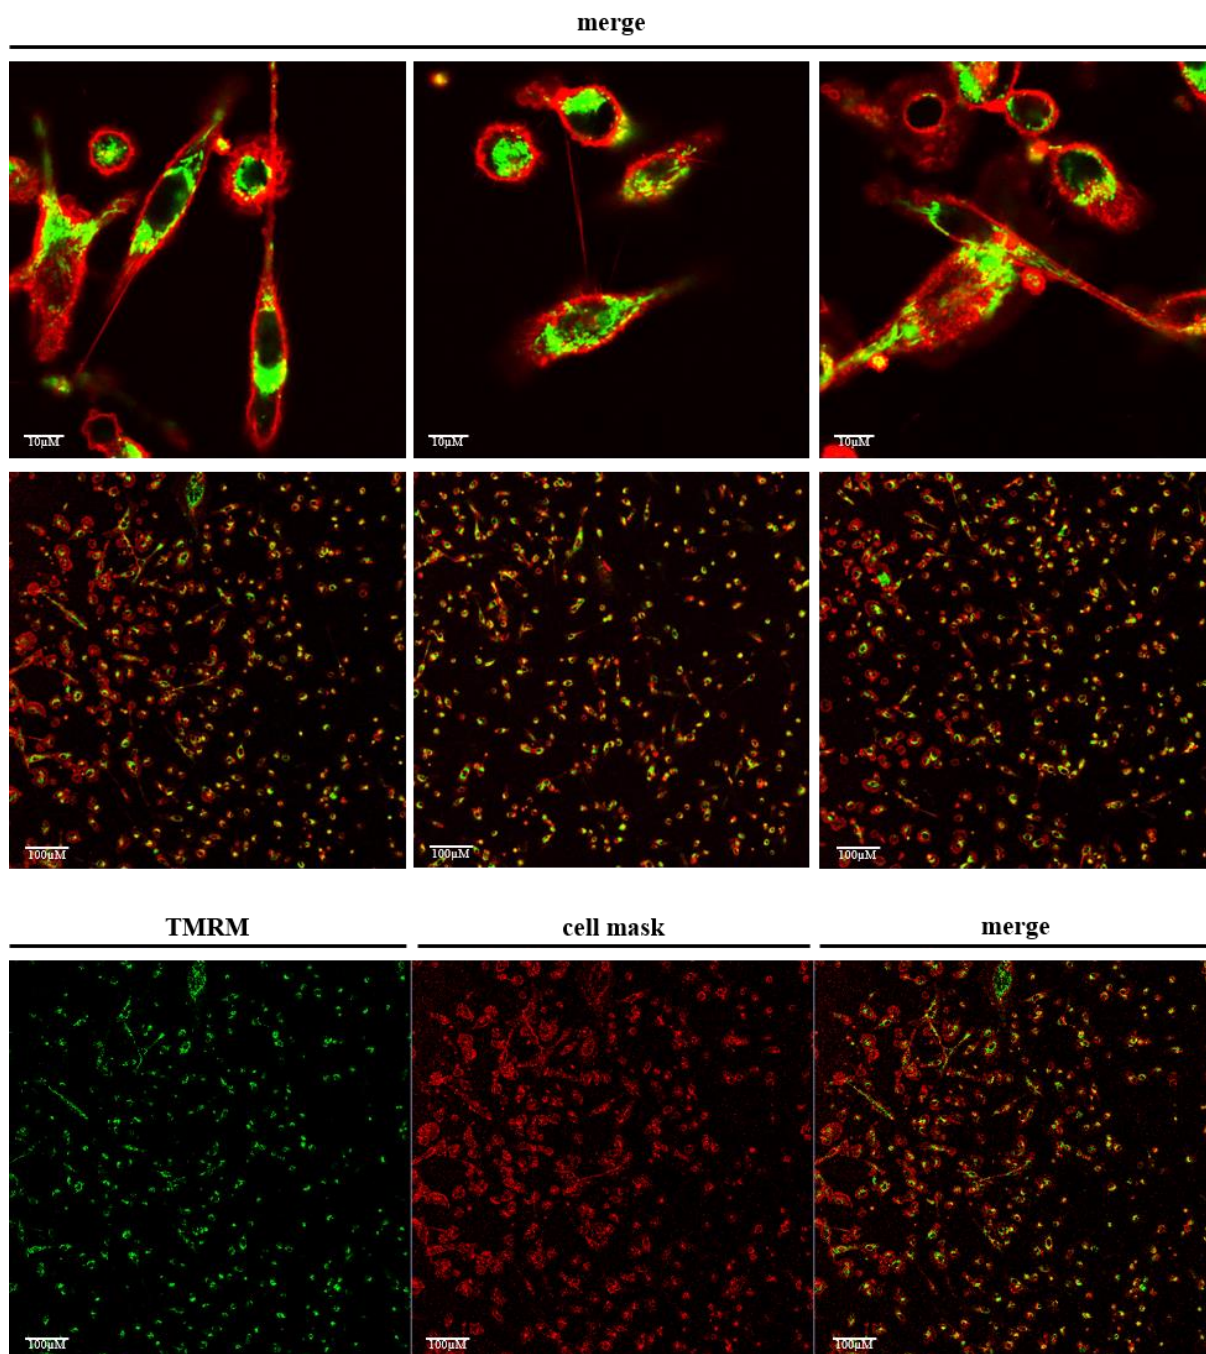

**Supplementary Figure 5 A. TMRM-induced mitochondrial membrane potential loss of MDA-MB-231 cells.** MDA-MB-231 cells were stained with 20  $\mu$ M TMRM (MitoProbe™ TMRM Kit for Flow Cytometry, M20036, Invitrogen) and 5mg/ml cell membrane stain (CellMask™ Deep Red Plasma membrane Stain, C10046, ThermoFisher). Loss of mitochondrial membrane potential was indicated by a reduced TMRM signal. Membrane- and TMRM-stained cells are shown in merge for single cells (top), population (middle) and for single channels (bottom). (A) Unstimulated MDA-MB-231 cells were used as negative control.

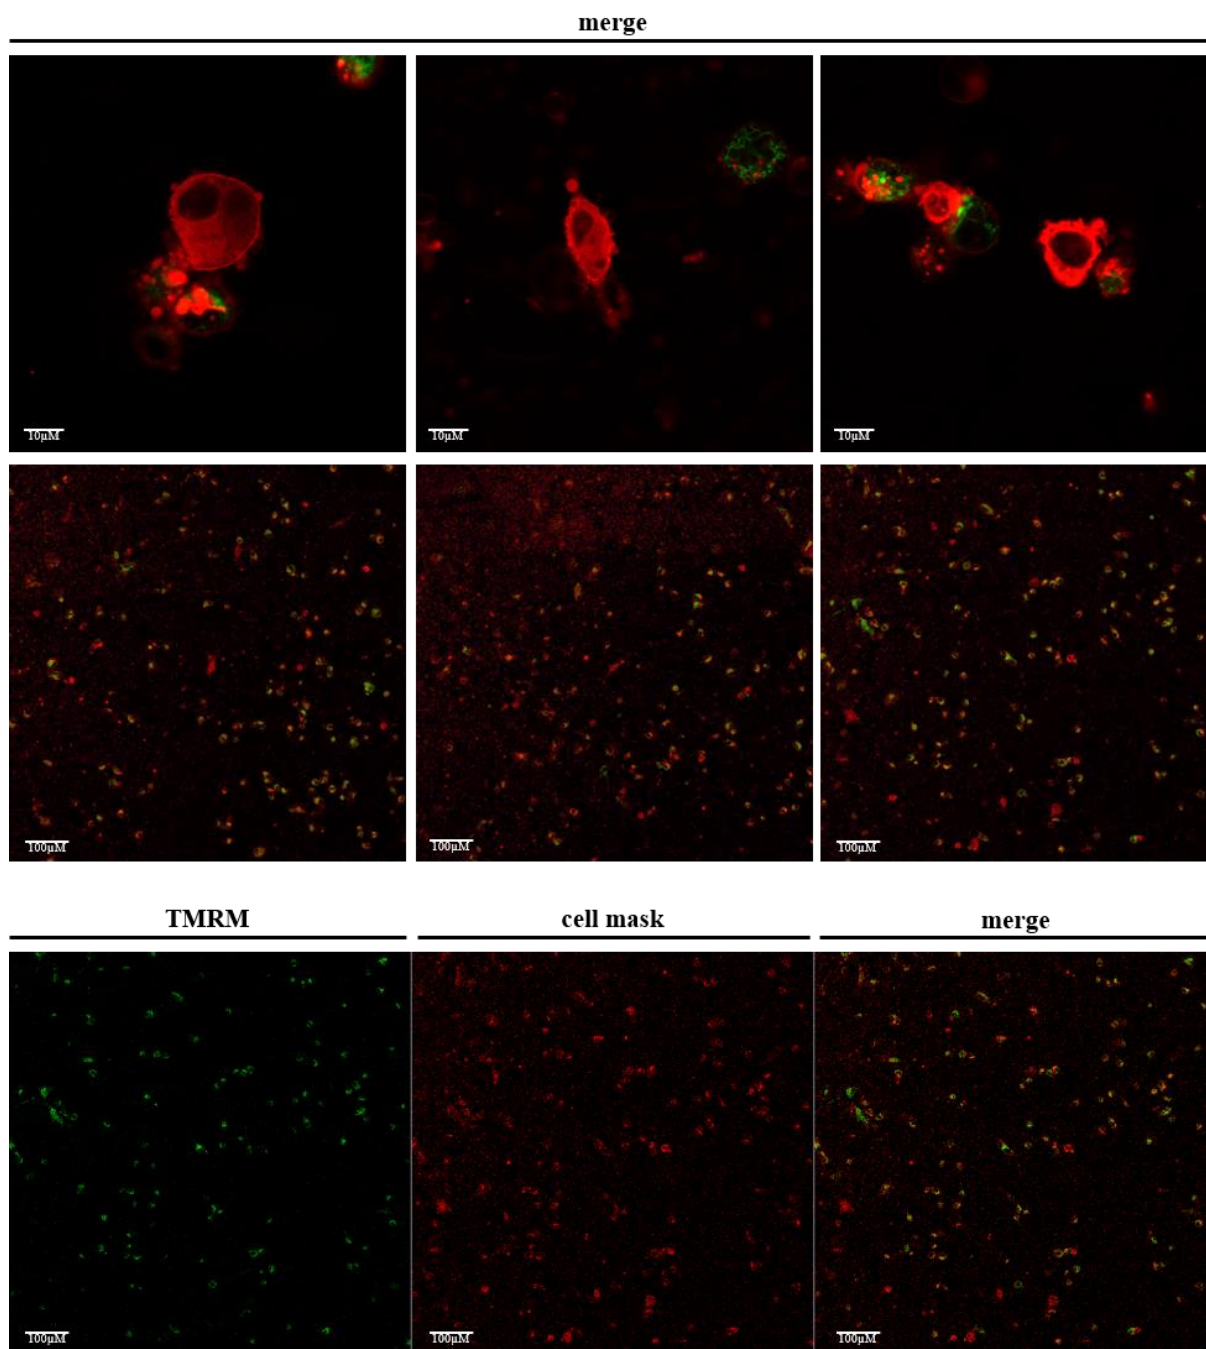

**Supplementary Figure 5 B. TMRM-indicated mitochondrial membrane potential loss of MDA-MB-231 cells.** MDA-MB-231 cells were stained with 20  $\mu$ M TMRM (MitoProbe™ TMRM Kit for Flow Cytometry, M20036, Invitrogen) and 5mg/ml cell membrane stain (CellMask™ Deep Red Plasma membrane Stain, C10046, ThermoFisher). Loss of mitochondrial membrane potential was indicated by a reduced TMRM signal. Membrane- and TMRM-stained cells are shown in merge for single cells (top), population (middle) and for single channels (bottom). (B) MDA-MB-231 cells were prior stimulated for six hours with 300  $\mu$ g/ml RL2.



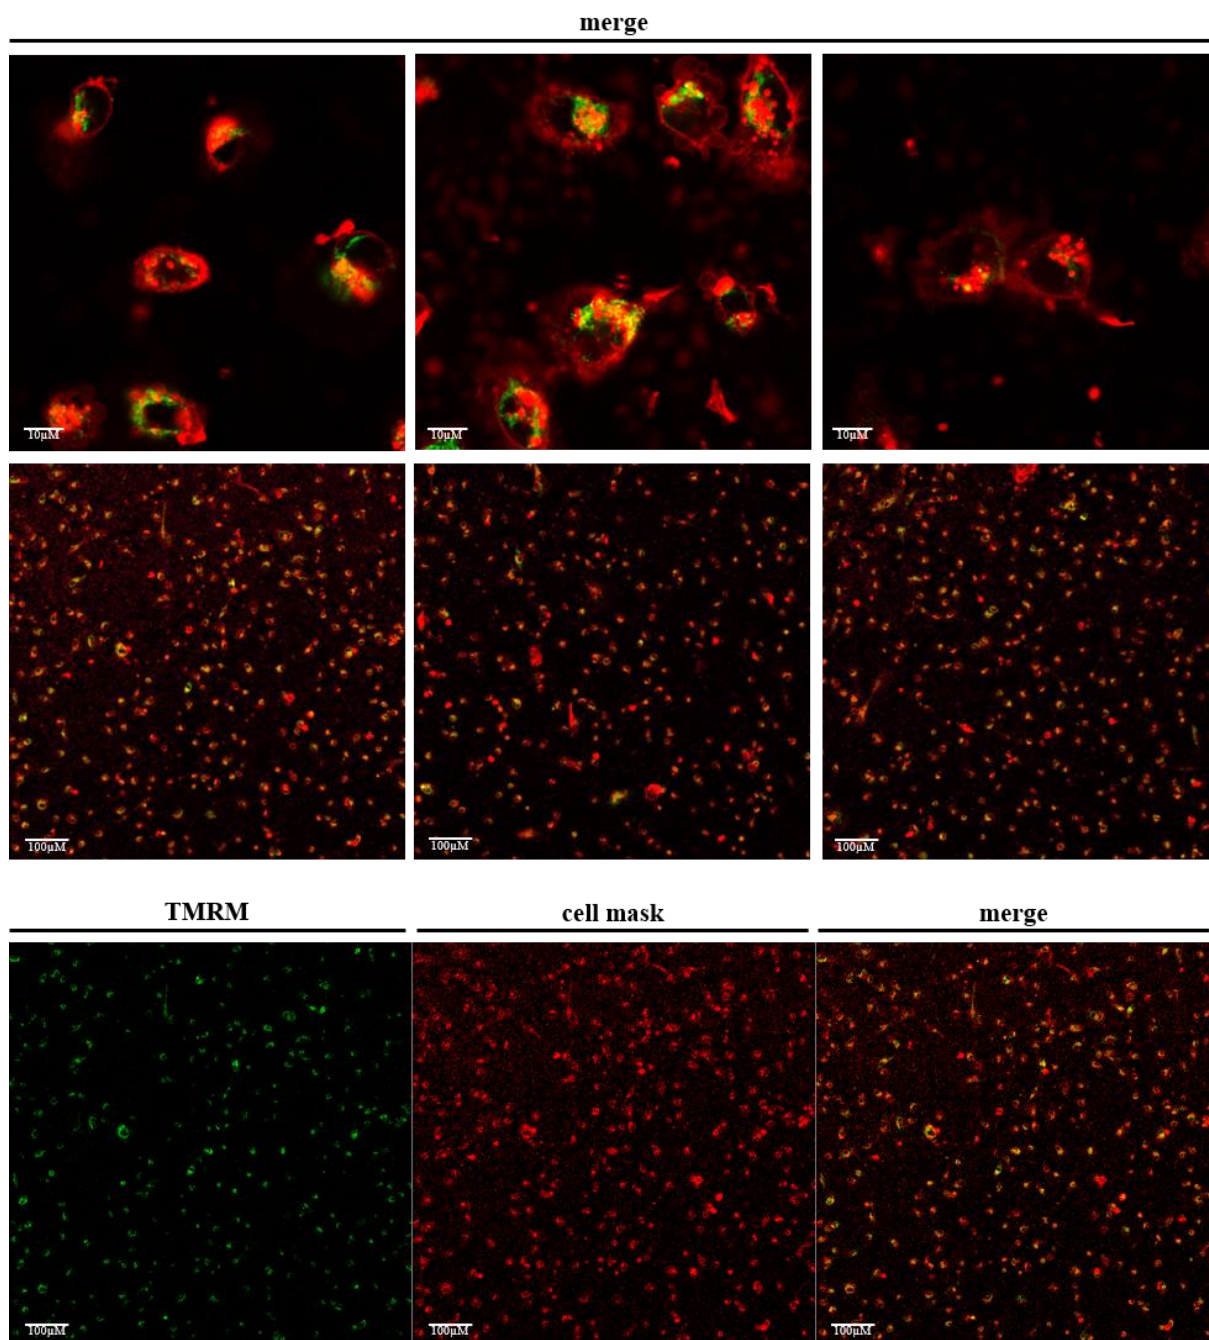

**Supplementary Figure 5 C. TMRM-induced mitochondrial membrane potential loss of MDA-MB-231 cells.**  
MDA-MB-231 cells were stained with 20  $\mu$ M TMRM (MitoProbe™ TMRM Kit for Flow Cytometry, M20036, Invitrogen) and 5mg/ml cell membrane stain (CellMask™ Deep Red Plasma membrane Stain, C10046, ThermoFisher). Loss of mitochondrial membrane potential was indicated by a reduced TMRM signal. Membrane- and TMRM-stained cells are shown in merge for single cells (top), population (middle) and for single channels (bottom). (C) MDA-MB-231 cells were prior stimulated for 24 hours with 300  $\mu$ g/ml RL2.



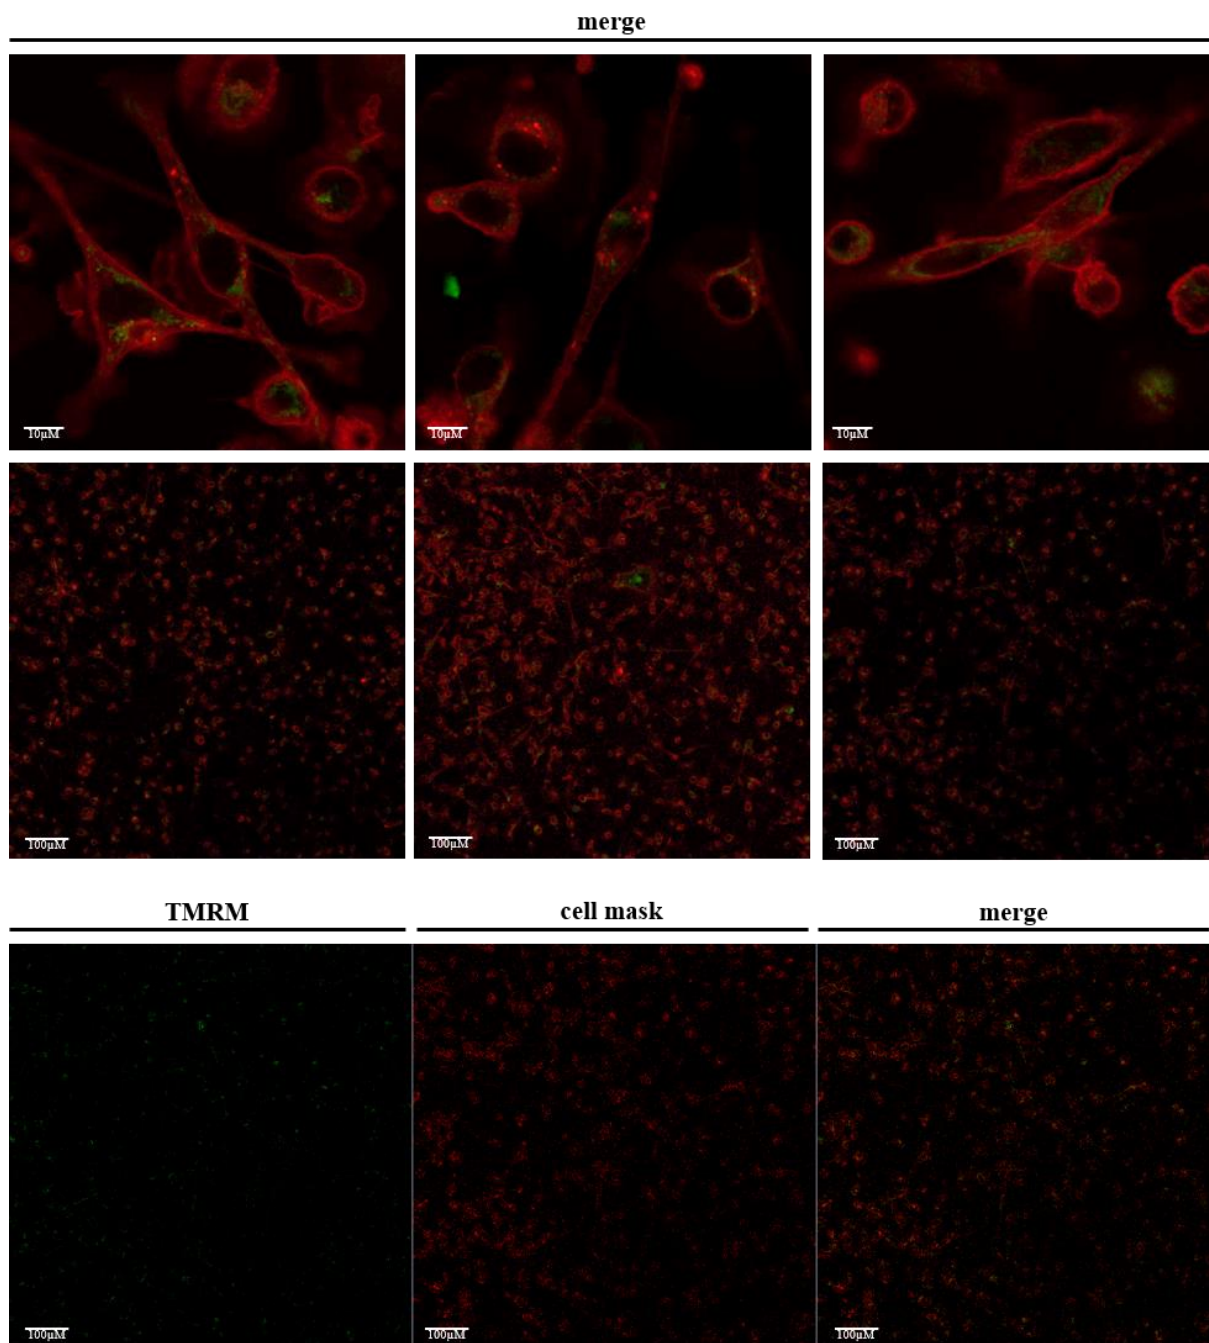

**Supplementary Figure 5 D. TMRM-induced mitochondrial membrane potential loss of MDA-MB-231 cells.** MDA-MB-231 cells were stained with 20  $\mu$ M TMRM (MitoProbe™ TMRM Kit for Flow Cytometry, M20036, Invitrogen) and 5mg/ml cell membrane stain (CellMask™ Deep Red Plasma membrane Stain, C10046, ThermoFisher). Loss of mitochondrial membrane potential was indicated by a reduced TMRM signal. Membrane- and TMRM-stained cells are shown in merge for single cells (top), population (middle) and for single channels (bottom). (D) MDA-MB-231 cells were prior stimulated for 5 min with CCCP.

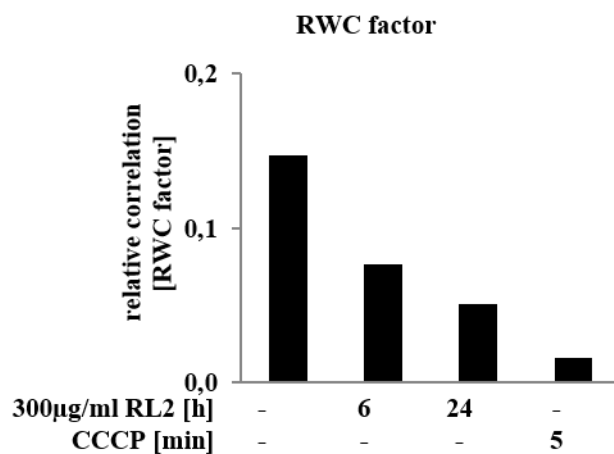

**Supplementary Figure 5 E. Quantification of mitochondrial membrane potential loss.**

Three independent cell overview images for indicated stimulations were quantitatively analyzed for correlation of TMRM and red membrane stain positive cells with cell image analysis software (CellProfiler, Stable 3.1.8). Induced correlation is shown by Rank-Weighted Co-localization (RWC) factor.

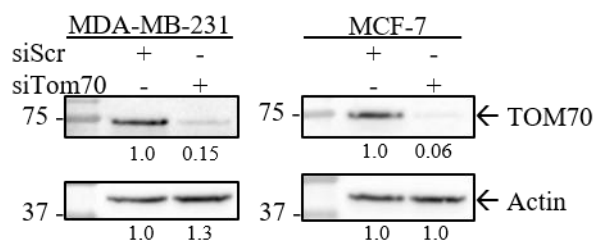

**Supplementary Figure 6. Relative Western Blot quantifications of Figure 7.**

Quantification of protein band intensities were performed for three independent experiments with ImageLab 5.1beta (Bio-Rad). One representative quantification is shown here. Probes with a value of 1.0 served as reference for that specific protein. For more information see Figure 7.

**Supplementary Table 1 - Absolute values of unique peptides and coverages of potential RL2-interacting proteins identified by mass spectrometry.** The analysis of potential RL2-interacting proteins in Figure 4B, are based on the absolute values shown here. The abbreviations  $n_1$ ,  $n_2$  and  $n_3$  indicate absolute values for every experimental replicate.

| protein | ID     | RL2-pulldown    |       |       |              |       |       | control         |       |       |              |       |       |
|---------|--------|-----------------|-------|-------|--------------|-------|-------|-----------------|-------|-------|--------------|-------|-------|
|         |        | unique peptides |       |       | coverage [%] |       |       | unique peptides |       |       | coverage [%] |       |       |
|         |        | $n_1$           | $n_2$ | $n_3$ | $n_1$        | $n_2$ | $n_3$ | $n_1$           | $n_2$ | $n_3$ | $n_1$        | $n_2$ | $n_3$ |
| 2AAA    | P30153 | 23              | 25    | 23    | 60           | 62    | 63    | 4               | 7     | 2     | 12           | 18    | 13    |
| ACTN1   | P12814 | 37              | 34    | 38    | 75           | 75    | 76    | 10              | 12    | 4     | 35           | 42    | 20    |
| CASK    | P07498 | 88              | 85    | 84    | 60           | 59    | 59    | 21              | 7     | -     | 57           | 45    | -     |
| CH60    | P10809 | 58              | 58    | 45    | 71           | 77    | 72    | 28              | 34    | 10    | 64           | 67    | 27    |
| CXA1    | P12074 | 2               | -     | -     | 43           | -     | -     | -               | -     | -     | -            | -     | -     |
| EFTU    | P49411 | 18              | 21    | 23    | 51           | 57    | 59    | 9               | 23    | 6     | 27           | 60    | 20    |
| GRP75   | P38646 | 23              | 22    | 22    | 46           | 43    | 44    | 15              | 19    | 4     | 37           | 37    | 15    |
| HCD2    | Q99714 | 9               | 5     | 7     | 62           | 41    | 54    | 1               | 9     | 3     | 10           | 58    | 25    |
| HNRPF   | P52597 | 20              | 21    | 18    | 62           | 60    | 62    | 12              | 7     | 4     | 52           | 34    | 22    |
| HNRPL   | P14866 | 20              | 14    | 17    | 60           | 47    | 54    | 6               | 4     | 3     | 29           | 17    | 17    |
| MIF     | P14174 | 3               | 3     | 3     | 65           | 36    | 36    | 1               | 8     | 2     | 8            | 70    | 43    |
| MPPA    | Q10713 | 12              | 13    | 17    | 43           | 39    | 49    | -               | -     | -     | -            | -     | -     |
| MYL6    | P60660 | 11              | 12    | 8     | 84           | 84    | 58    | 1               | 16    | 4     | 16           | 85    | 36    |
| PPIA    | P62937 | 11              | 12    | 11    | 67           | 67    | 67    | 3               | 19    | 3     | 19           | 67    | 26    |
| PTBP1   | P26599 | 16              | 18    | 16    | 66           | 69    | 66    | 10              | 9     | 8     | 44           | 37    | 37    |
| PYR1    | P27708 | 81              | 99    | 95    | 60           | 66    | 65    | 19              | 9     | 4     | 21           | 9     | 6     |
| RLA1    | P05386 | 2               | 3     | 3     | 67           | 88    | 88    | 4               | 3     | 2     | 88           | 82    | 52    |
| RLA2    | P05387 | 5               | 6     | 4     | 84           | 84    | 84    | 6               | 7     | -     | 85           | 85    | -     |
| RS3     | P23396 | 14              | 7     | 13    | 64           | 28    | 63    | 12              | 12    | 1     | 56           | 56    | 6     |
| RT17    | Q9Y2R5 | 4               | 3     | 4     | 52           | 36    | 54    | 1               | -     | -     | 15           | -     | -     |
| SDHA    | P31040 | 18              | 17    | 22    | 48           | 43    | 52    | -               | 10    | 5     | -            | 26    | 18    |
| TBB5    | P07437 | 7               | 7     | 10    | 92           | 92    | 92    | 7               | 5     | 3     | 89           | 91    | 53    |
| TIM8A   | O60220 | 4               | 4     | 4     | 68           | 67    | 64    | -               | -     | -     | -            | -     | -     |
| TIM8B   | Q9Y5J9 | 3               | 3     | 3     | 42           | 42    | 42    | -               | -     | -     | -            | -     | -     |
| TOM70   | O94826 | 15              | 17    | 18    | 41           | 47    | 50    | -               | -     | -     | -            | -     | -     |

98 **Supplementary Table 2 - Absolute values of unique peptides and coverages of all mitochondrial proteins identified by**  
 99 **mass spectrometry.** Abbreviations n<sub>1</sub>, n<sub>2</sub> and n<sub>3</sub> indicate absolute values for every experimental replicate.

| ID     | RL2-pulldown    |                |                |                |                |                | control         |                |                |                |                |                |
|--------|-----------------|----------------|----------------|----------------|----------------|----------------|-----------------|----------------|----------------|----------------|----------------|----------------|
|        | unique peptides |                |                | coverage [%]   |                |                | unique peptides |                |                | coverage [%]   |                |                |
|        | n <sub>1</sub>  | n <sub>2</sub> | n <sub>3</sub> | n <sub>1</sub> | n <sub>2</sub> | n <sub>3</sub> | n <sub>1</sub>  | n <sub>2</sub> | n <sub>3</sub> | n <sub>1</sub> | n <sub>2</sub> | n <sub>3</sub> |
| P00505 | -               | -              | -              | -              | -              | -              | -               | 3              | -              | -              | 12             | -              |
| Q9UKU7 | -               | -              | 2              | -              | -              | 5              | -               | -              | -              | -              | -              | -              |
| P49748 | -               | -              | -              | -              | -              | -              | -               | -              | 1              | -              | -              | 4              |
| Q99798 | -               | 1              | -              | -              | 2              | -              | -               | -              | 2              | -              | -              | 6              |
| Q9Y305 | -               | 5              | 12             | -              | 14             | 31             | -               | 9              | 3              | -              | 24             | 10             |
| O14561 | 2               | 3              | 3              | 19             | 22             | 22             | -               | 3              | -              | -              | 24             | -              |
| Q9H6R3 | -               | -              | -              | -              | -              | -              | -               | 1              | 1              | -              | 2              | 2              |
| Q53H12 | 3               | -              | -              | 12             | -              | -              | 7               | -              | -              | 27             | -              | -              |
| O95831 | -               | 1              | 5              | -              | 2              | 16             | -               | -              | -              | -              | -              | -              |
| Q92667 | -               | 2              | -              | -              | 4              | -              | -               | -              | 1              | -              | -              | 3              |
| P30837 | -               | 3              | -              | -              | 10             | -              | -               | -              | 2              | -              | -              | 5              |
| P05091 | 2               | -              | 3              | 4              | -              | 8              | -               | 3              | 1              | -              | 13             | 3              |
| O75947 | -               | -              | -              | -              | -              | -              | 4               | 4              | 1              | 30             | 38             | 13             |
| P56385 | -               | -              | -              | -              | -              | -              | -               | 1              | -              | -              | 14             | -              |
| P18859 | -               | -              | -              | -              | -              | -              | 3               | -              | -              | 44             | -              | -              |
| P25705 | -               | 12             | 13             | -              | 29             | 33             | 19              | 24             | 4              | 41             | 48             | 10             |
| P06576 | 11              | 11             | 8              | 37             | 39             | 31             | -               | -              | 6              | -              | -              | 28             |
| P30049 | -               | -              | -              | -              | -              | -              | -               | 2              | -              | -              | 14             | -              |
| Q8N5M1 | -               | 6              | 7              | -              | 25             | 49             | -               | -              | -              | -              | -              | -              |
| P36542 | 1               | -              | 2              | 4              | -              | 8              | 4               | -              | -              | 21             | -              | -              |
| P56134 | -               | -              | -              | -              | -              | -              | -               | 2              | 1              | -              | 26             | 14             |
| P48047 | -               | -              | -              | -              | -              | -              | -               | 7              | 1              | -              | 46             | 8              |
| O14874 | -               | -              | 3              | -              | -              | 13             | -               | -              | -              | -              | -              | -              |
| Q02338 | 1               | 1              | 2              | 3              | 3              | 10             | -               | -              | 1              | -              | -              | 8              |
| O43684 | -               | 6              | -              | -              | 23             | -              | -               | -              | -              | -              | -              | -              |
| Q07021 | -               | 5              | 6              | -              | 27             | 41             | 4               | -              | 1              | 22             | -              | 10             |
| Q6UB35 | 1               | -              | 1              | 2              | -              | 2              | -               | -              | -              | -              | -              | -              |
| P61604 | -               | 2              | 1              | -              | 19             | 12             | -               | 6              | -              | -              | 60             | -              |
| P10809 | 58              | -              | -              | 71             | -              | -              | 28              | 34             | 10             | 64             | 67             | 27             |
| O75390 | -               | -              | -              | -              | -              | -              | -               | 5              | -              | -              | 18             | -              |
| O75153 | 27              | 14             | -              | 29             | 16             | -              | 4               | -              | -              | 5              | -              | -              |
| Q9UJS0 | 9               | 8              | 10             | 24             | 22             | 18             | -               | -              | -              | -              | -              | -              |
| P13073 | 3               | 4              | 4              | 20             | 26             | 26             | 4               | 2              | -              | 26             | 14             | -              |
| P20674 | 4               | 7              | 6              | 41             | 47             | 47             | -               | 2              | -              | -              | 23             | -              |
| P10606 | -               | 6              | 5              | -              | 40             | 39             | -               | -              | 3              | -              | -              | 24             |
| O14548 | -               | 1              | 45             | -              | 29             | 72             | -               | -              | -              | -              | -              | -              |
| P31327 | -               | -              | -              | -              | -              | 1              | -               | -              | -              | -              | -              | -              |
| P12074 | 2               | -              | -              | 43             | -              | -              | -               | -              | -              | -              | -              | -              |

|        |    |    |    |    |    |    |    |    |   |    |    |    |
|--------|----|----|----|----|----|----|----|----|---|----|----|----|
| P14406 | 2  | 2  | 2  | 28 | 28 | 28 | -  | -  | - | -  | -  | -  |
| P08574 | 4  | 2  | 2  | 18 | 10 | 10 | -  | -  | 1 | -  | -  | 7  |
| Q9NR28 | 1  | -  | -  | 4  | -  | -  | -  | -  | - | -  | -  | -  |
| P00367 | -  | -  | -  | -  | -  | -  | -  | 16 | - | -  | 35 | -  |
| P49448 | 3  | -  | -  | 5  | -  | -  | -  | -  | - | -  | -  | -  |
| Q96HY7 | -  | -  | 1  | -  | -  | 1  | -  | -  | - | -  | -  | -  |
| Q9UBX3 | -  | 2  | 6  | -  | 12 | 24 | -  | -  | 1 | -  | -  | 8  |
| P09622 | -  | -  | -  | -  | -  | -  | -  | 1  | 1 | -  | 2  | 3  |
| Q96EY1 | -  | 7  | 10 | -  | 16 | 33 | -  | -  | - | -  | -  | -  |
| P33316 | -  | -  | -  | -  | -  | -  | -  | 5  | - | -  | 25 | -  |
| Q13011 | -  | -  | -  | -  | -  | -  | -  | 3  | - | -  | 10 | -  |
| P40939 | 4  | 2  | 1  | 12 | 6  | 4  | -  | 8  | 6 | -  | 20 | 16 |
| P55084 | -  | -  | -  | -  | -  | -  | -  | 2  | - | -  | 8  | -  |
| P42126 | -  | -  | -  | -  | -  | -  | -  | 2  | 1 | -  | 9  | 4  |
| O75521 | -  | -  | -  | -  | -  | -  | -  | 7  | 2 | -  | 26 | 15 |
| P49411 | 18 | 21 | 23 | 51 | 57 | 59 | 9  | 23 | 6 | 27 | 60 | 20 |
| O75616 | 8  | 6  | -  | 31 | 24 | -  | -  | -  | - | -  | -  | -  |
| P13804 | -  | -  | -  | -  | -  | -  | -  | 3  | 2 | -  | 16 | 13 |
| Q9NYY8 | -  | -  | 1  | -  | -  | 2  | -  | -  | - | -  | -  | -  |
| P07954 | -  | -  | -  | -  | -  | -  | -  | -  | 8 | -  | -  | 28 |
| Q92947 | 2  | -  | -  | 8  | -  | -  | -  | -  | 1 | -  | -  | 6  |
| Q9H936 | -  | 1  | 2  | -  | 2  | 7  | -  | -  | - | -  | -  | -  |
| Q16775 | -  | -  | -  | -  | -  | -  | -  | 2  | - | -  | 8  | -  |
| P34897 | -  | -  | -  | -  | -  | -  | -  | 9  | 1 | -  | 29 | 8  |
| P43304 | -  | -  | -  | -  | -  | -  | -  | -  | 3 | -  | -  | 5  |
| P38646 | 23 | 22 | 22 | 46 | 43 | 44 | 15 | 19 | 4 | 37 | 37 | 15 |
| Q9HAV7 | -  | -  | -  | -  | -  | -  | -  | 1  | - | -  | 5  | -  |
| P00390 | -  | -  | -  | -  | -  | -  | -  | 2  | - | -  | 8  | -  |
| Q16836 | -  | -  | -  | -  | -  | -  | -  | 4  | 1 | -  | 27 | 7  |
| P36551 | -  | -  | 2  | -  | -  | 6  | -  | -  | 4 | -  | -  | 13 |
| O43464 | 2  | 1  | 2  | 8  | 3  | 11 | -  | -  | - | -  | -  | -  |
| P50213 | -  | -  | -  | -  | -  | -  | -  | 2  | - | -  | 9  | -  |
| Q9H2U2 | -  | -  | -  | -  | -  | -  | -  | 12 | 3 | -  | 51 | 15 |
| Q9H1K1 | -  | -  | -  | -  | -  | -  | -  | -  | 1 | -  | -  | 5  |
| P54819 | -  | -  | -  | -  | -  | -  | -  | 3  | 1 | -  | 14 | 4  |
| Q9UIJ7 | -  | -  | -  | -  | -  | -  | -  | 2  | - | -  | 8  | -  |
| O00142 | -  | 1  | -  | -  | 3  | -  | -  | -  | - | -  | -  | -  |
| P83111 | -  | 3  | -  | -  | 7  | -  | 5  | 4  | 1 | 14 | 12 | 3  |
| P36776 | -  | 14 | 12 | -  | 22 | 20 | -  | 2  | 1 | -  | 6  | 4  |
| P42704 | 26 | 31 | -  | 28 | 35 | -  | 3  | -  | 5 | 2  | -  | 7  |
| Q02978 | 7  | 6  | 4  | 26 | 23 | 12 | -  | 4  | - | -  | 14 | -  |
| O95819 | -  | -  | 1  | -  | -  | 3  | -  | -  | - | -  | -  | -  |
| P23368 | -  | -  | -  | -  | -  | -  | -  | -  | 1 | -  | -  | 7  |
| Q9HCC0 | -  | -  | 2  | -  | -  | 7  | -  | -  | - | -  | -  | -  |
| P40926 | -  | -  | -  | -  | -  | -  | -  | 13 | 2 | -  | 53 | 11 |



|        |    |    |    |    |    |    |   |    |   |    |    |    |
|--------|----|----|----|----|----|----|---|----|---|----|----|----|
| Q9BQP7 | -  | -  | -  | -  | -  | -  | - | 1  | 1 | -  | 4  | 8  |
| Q9Y3D0 | -  | -  | 2  | -  | -  | 26 | - | -  | - | -  | -  | -  |
| Q02750 | -  | -  | -  | -  | -  | -  | - | 4  | 1 | -  | 12 | 4  |
| Q00325 | -  | -  | -  | -  | -  | -  | - | 9  | - | -  | 23 | -  |
| Q10713 | 12 | 13 | 17 | 43 | 39 | 49 | - | -  | - | -  | -  | -  |
| O75439 | -  | 12 | -  | -  | 37 | -  | - | -  | - | -  | -  | -  |
| O75439 | -  | -  | 14 | -  | -  | 42 | - | -  | 2 | -  | -  | 10 |
| Q7L0Y3 | -  | -  | -  | -  | -  | -  | - | 1  | 1 | -  | 4  | 4  |
| Q96E29 | -  | 1  | 4  | -  | 5  | 12 | - | -  | - | -  | -  | -  |
| Q16795 | -  | -  | 5  | -  | -  | 17 | - | -  | - | -  | -  | -  |
| O95299 | -  | 9  | 8  | -  | 31 | 32 | - | 1  | 1 | -  | 6  | 6  |
| Q5TEU4 | 1  | -  | 1  | 5  | -  | 5  | - | -  | - | -  | -  | -  |
| P28331 | -  | -  | 2  | -  | -  | 3  | - | 1  | - | -  | 3  | -  |
| O75306 | -  | 5  | -  | -  | 14 | -  | - | 2  | - | -  | 8  | -  |
| O75489 | 9  | 7  | -  | 42 | 36 | -  | - | 4  | 1 | -  | 22 | 6  |
| O75251 | 2  | 2  | 2  | 11 | 11 | 11 | - | -  | - | -  | -  | -  |
| O00217 | 3  | 2  | 2  | 24 | 15 | 10 | - | -  | - | -  | -  | -  |
| P19404 | -  | -  | -  | -  | -  | -  | - | -  | 1 | -  | -  | 4  |
| Q13423 | -  | -  | -  | -  | -  | -  | - | 2  | - | -  | 2  | -  |
| P04181 | -  | 1  | 1  | -  | 5  | 6  | - | 6  | 4 | -  | 30 | 24 |
| P12694 | 1  | -  | -  | 3  | -  | -  | - | -  | - | -  | -  | -  |
| P21953 | -  | -  | 1  | -  | -  | 5  | - | -  | - | -  | -  | -  |
| Q02218 | -  | -  | -  | -  | -  | -  | - | -  | 1 | -  | -  | 1  |
| P36957 | -  | -  | -  | -  | -  | -  | - | -  | 2 | -  | -  | 6  |
| P10515 | -  | -  | -  | -  | -  | -  | - | 1  | 2 | -  | 2  | 7  |
| P11177 | -  | 3  | 6  | -  | 10 | 19 | - | -  | - | -  | -  | -  |
| O60313 | -  | -  | 4  | -  | -  | 8  | - | 15 | 5 | -  | 22 | 10 |
| P32322 | -  | 3  | 6  | -  | 21 | 30 | - | -  | 1 | -  | -  | 4  |
| Q9P0J1 | 10 | -  | -  | 25 | -  | -  | - | -  | - | -  | -  | -  |
| Q8NCN5 | 6  | -  | -  | 12 | -  | -  | - | -  | - | -  | -  | -  |
| Q8NCN  | -  | 5  | -  | -  | 10 | -  | - | -  | - | -  | -  | -  |
| Q96HS1 | -  | -  | 2  | -  | -  | 9  | 3 | -  | - | 11 | -  | -  |
| P30405 | -  | -  | -  | -  | -  | -  | - | -  | 4 | -  | -  | 35 |
| P30048 | 5  | 4  | 4  | 30 | 18 | 18 | - | -  | - | -  | -  | -  |
| P30044 | -  | 1  | 1  | -  | 8  | 8  | - | 3  | 1 | -  | 17 | 8  |
| O75127 | 3  | 2  | 2  | 5  | 3  | 3  | - | -  | - | -  | -  | -  |
| Q96EY7 | 13 | 4  | 8  | 29 | 11 | 16 | - | -  | - | -  | -  | -  |
| P11498 | 2  | -  | 10 | 4  | -  | 16 | - | 2  | 2 | -  | 3  | 5  |
| P31930 | -  | 15 | 17 | -  | 49 | 52 | - | 6  | 5 | -  | 26 | 25 |
| P22695 | 14 | 14 | -  | 54 | 50 | -  | - | 8  | 1 | -  | 32 | 8  |
| P07919 | -  | -  | -  | -  | -  | -  | - | -  | 1 | -  | -  | 20 |
| Q9BYD6 | -  | 2  | 2  | -  | 10 | 10 | - | -  | - | -  | -  | -  |
| P09001 | -  | -  | 2  | -  | -  | 8  | - | -  | - | -  | -  | -  |
| Q9BYD3 | 4  | -  | 3  | 26 | -  | 23 | - | -  | - | -  | -  | -  |
| Q9BYD2 | 2  | -  | 1  | 10 | -  | 6  | - | -  | - | -  | -  | -  |

|        |    |    |   |    |    |    |   |    |   |   |    |    |
|--------|----|----|---|----|----|----|---|----|---|---|----|----|
| P52815 | -  | 2  | 4 | -  | 11 | 30 | - | 1  | - | - | 17 | -  |
| Q6P1L8 | -  | 1  | - | -  | 7  | -  | - | -  | - | - | -  | -  |
| Q9P015 | -  | 1  | 1 | -  | 3  | 3  | - | -  | - | - | -  | -  |
| Q9NRX2 | -  | 1  | 1 | -  | 18 | 4  | - | -  | - | - | -  | -  |
| P49406 | 2  | -  | 2 | 6  | -  | 6  | - | -  | - | - | -  | -  |
| Q16540 | -  | -  | 2 | -  | -  | 37 | - | -  | - | - | -  | -  |
| Q13084 | -  | -  | - | -  | -  | -  | - | -  | 1 | - | -  | 9  |
| Q9NYK5 | 2  | 2  | 3 | 8  | 8  | 11 | - | -  | - | - | -  | -  |
| Q8IXM3 | -  | 1  | 1 | -  | 24 | 24 | - | -  | - | - | -  | -  |
| Q8N983 | -  | 1  | - | -  | 5  | -  | - | -  | - | - | -  | -  |
| Q9H9J2 | -  | 1  | - | -  | 3  | -  | - | -  | - | - | -  | -  |
| Q13405 | 2  | 2  | 2 | 15 | 15 | 15 | - | 1  | 1 | - | 7  | 7  |
| Q8N5N7 | -  | 1  | 2 | -  | 13 | 25 | - | -  | - | - | -  | -  |
| Q9Y399 | -  | 2  | 5 | -  | 6  | 30 | - | -  | - | - | -  | -  |
| P82675 | 7  | 8  | 5 | 19 | 26 | 16 | - | -  | - | - | -  | -  |
| Q9Y2R9 | -  | 3  | 8 | -  | 14 | 27 | - | -  | - | - | -  | -  |
| P82933 | -  | 5  | 5 | -  | 15 | 16 | - | -  | - | - | -  | -  |
| P82664 | -  | -  | 4 | -  | -  | 33 | - | -  | - | - | -  | -  |
| P82912 | -  | 1  | - | -  | 15 | -  | - | -  | - | - | -  | -  |
| O60783 | -  | 1  | 2 | -  | 12 | 22 | - | -  | - | - | -  | -  |
| P82914 | -  | 1  | 3 | -  | 4  | 10 | - | -  | - | - | -  | -  |
| Q9Y3D3 | -  | 3  | - | -  | 28 | -  | - | -  | - | - | -  | -  |
| Q9Y2R5 | 4  | 3  | 4 | 52 | 36 | 52 | - | -  | - | - | -  | -  |
| Q9Y676 | -  | 4  | 4 | -  | 33 | 33 | - | -  | - | - | -  | -  |
| Q9Y3D5 | 1  | 1  | 2 | 18 | 13 | 18 | - | -  | - | - | -  | -  |
| P82921 | 1  | -  | 1 | 14 | -  | 14 | - | -  | - | - | -  | -  |
| P82650 | -  | 11 | - | -  | 39 | -  | - | -  | - | - | -  | -  |
| Q9Y3D9 | 6  | -  | 7 | 41 | -  | 49 | - | -  | - | - | -  | -  |
| Q96EL2 | 2  | -  | - | 16 | -  | -  | - | -  | - | - | -  | -  |
| Q9BYN8 | -  | 2  | 1 | -  | 9  | 5  | - | -  | - | - | -  | -  |
| Q92552 | 9  | 8  | 7 | 26 | 23 | 18 | - | -  | - | - | -  | -  |
| Q9Y2Q9 | 4  | 4  | 4 | 34 | 24 | 24 | - | -  | - | - | -  | -  |
| P51398 | -  | 8  | - | -  | 28 | -  | - | -  | - | - | -  | -  |
| P82930 | -  | 3  | 4 | -  | 25 | 28 | - | 1  | - | - | 6  | -  |
| P82673 | 6  | -  | 4 | 32 | -  | 22 | - | -  | - | - | -  | -  |
| Q6NUK1 | -  | -  | - | -  | -  | -  | 3 | 1  | - | 6 | 3  | -  |
| P31040 | 18 | -  | - | 48 | -  | -  | - | 10 | 5 | - | 26 | 18 |
| P21912 | -  | 4  | 5 | -  | 16 | 22 | - | 5  | 2 | - | 20 | 15 |
| Q9NTG7 | 2  | 1  | 2 | 8  | 6  | 8  | - | -  | - | - | -  | -  |
| Q9GZT3 | -  | 2  | 3 | -  | 22 | 35 | - | -  | - | - | -  | -  |
| P04179 | -  | -  | - | -  | -  | -  | - | 2  | 1 | - | 13 | 6  |
| O15269 | -  | 1  | 3 | -  | 4  | 12 | - | -  | - | - | -  | -  |
| Q9Y6N5 | -  | -  | - | -  | -  | -  | - | 1  | - | - | 3  | -  |
| Q9UJZ1 | -  | 1  | 1 | -  | 4  | 4  | - | -  | 1 | - | -  | 4  |
| Q96I99 | -  | -  | - | -  | -  | -  | - | 2  | - | - | 6  | -  |

|        |    |    |    |    |    |    |   |    |   |    |    |    |
|--------|----|----|----|----|----|----|---|----|---|----|----|----|
| Q8IYB8 | -  | -  | 1  | -  | -  | 2  | - | -  | - | -  | -  | -  |
| O95363 | -  | -  | 4  | -  | -  | 10 | - | -  | - | -  | -  | -  |
| P49590 | -  | -  | -  | -  | -  | -  | - | 2  | - | -  | 4  | -  |
| Q9NSE4 | -  | -  | -  | -  | -  | -  | - | 1  | - | -  | 1  | -  |
| Q7L3T8 | -  | 1  | 1  | -  | 5  | 5  | - | -  | - | -  | -  | -  |
| Q9NP81 | -  | -  | 1  | -  | -  | 3  | - | -  | - | -  | -  | -  |
| Q5ST30 | -  | -  | -  | -  | -  | -  | - | -  | - | -  | 1  | -  |
| Q00059 | -  | -  | 1  | -  | -  | 4  | - | -  | - | -  | -  | -  |
| P24752 | -  | 3  | 5  | -  | 8  | 15 | - | 12 | 2 | -  | 38 | 10 |
| P42765 | -  | -  | -  | -  | -  | -  | - | -  | 1 | -  | -  | 7  |
| Q5SRD1 | -  | 1  | 1  | -  | 4  | 4  | - | -  | - | -  | -  | -  |
| P62072 | 1  | -  | 2  | 14 | -  | 26 | - | -  | - | -  | -  | -  |
| Q9Y5L4 | 2  | -  | 3  | 26 | -  | 43 | - | -  | - | -  | -  | -  |
| Q9Y3D7 | -  | -  | -  | -  | -  | -  | 3 | 1  | - | 33 | 18 | -  |
| O14925 | -  | 1  | 1  | -  | 5  | 5  | - | -  | - | -  | -  | -  |
| Q9BSF4 | -  | 2  | 5  | -  | 15 | 30 | - | -  | - | -  | -  | -  |
| Q3ZCQ8 | -  | -  | -  | -  | -  | -  | - | 1  | 1 | -  | 3  | 3  |
| O60220 | 4  | -  | 4  | 68 | -  | 64 | - | -  | - | -  | -  | -  |
| Q9Y5J9 | -  | 3  | 3  | -  | 42 | 42 | - | -  | - | -  | -  | -  |
| Q9Y5J7 | 2  | 2  | 2  | 29 | 29 | 29 | - | -  | - | -  | -  | -  |
| O60784 | 1  | -  | -  | 3  | -  | -  | - | -  | - | -  | -  | -  |
| Q15388 | 1  | 1  | 1  | 9  | 9  | 9  | - | -  | - | -  | -  | -  |
| Q9NS69 | -  | -  | -  | -  | -  | -  | - | 1  | - | -  | 18 | -  |
| Q15785 | -  | 1  | -  | -  | 5  | -  | - | 5  | 1 | -  | 24 | 5  |
| O94826 | 15 | 17 | 18 | 41 | 46 | 50 | - | -  | - | -  | -  | -  |
| Q12931 | -  | -  | 1  | -  | 2  | 4  | - | 3  | - | -  | 11 | -  |
| Q6DKK2 | -  | 6  | 3  | -  | 25 | 19 | - | -  | - | -  | -  | -  |
| Q6IBS0 | -  | -  | -  | -  | -  | -  | - | 1  | - | -  | 5  | -  |
| P53007 | 2  | -  | 2  | 8  | -  | 8  | - | -  | - | -  | -  | -  |
| P47985 | -  | 1  | -  | -  | 9  | -  | - | 2  | - | -  | 8  | -  |
